# Supplementary material for: Naked eye sensing of melamine using rationally tailored gold nanoparticles: hydrogen-bonding and charge-transfer recognition
Source: Royal Society of Chemistry journal article supplement (doi:10.1039/c0an00870b), 2011-01-01

## Electronic Supporting Information:

### Naked Eye Sensing of Melamine Using Rationally Tailored Gold Nanoparticles: Charge-Transfer and Hydrogen-bonding Recognition

Raj Kumar Bera and C. Retna Raj\*

Department of Chemistry, Indian Institute of Technology, Kharagpur 721308, India

*crroj@chem.iitkgp.ernet.in*

**Figure ESI1**

The plots obtained from DLS measurement, illustrating the particle size distribution of (a) UCA and (b) TNBS-tailored reporters.

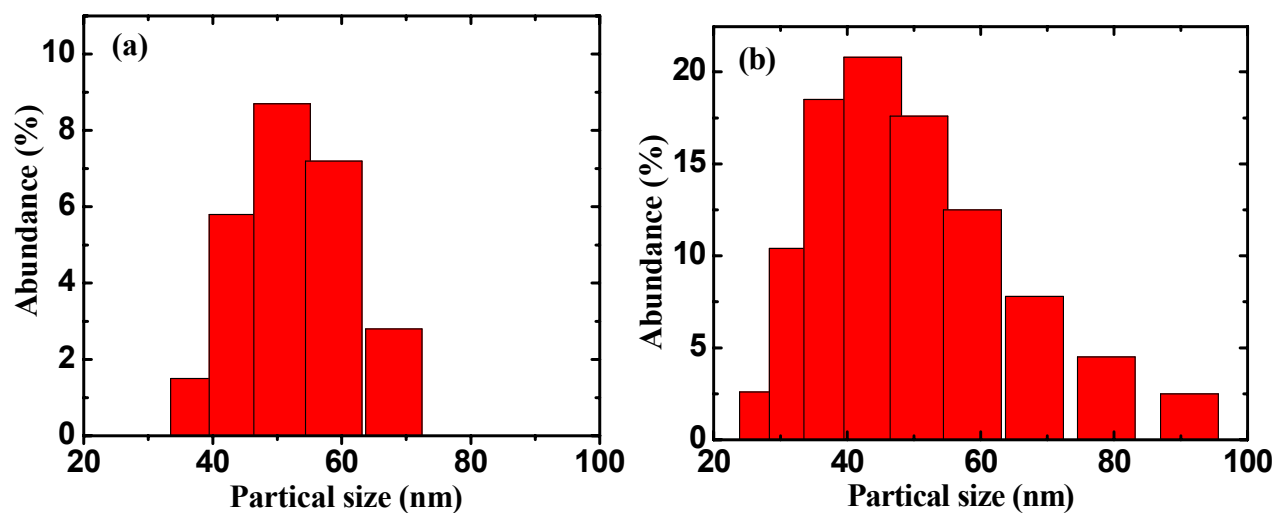

**Figure ESI2**

FTIR spectra of (a) UCA, (b) UCA-tailored reporters, (c) TNBS and (d) TNBS-tailored reporters.

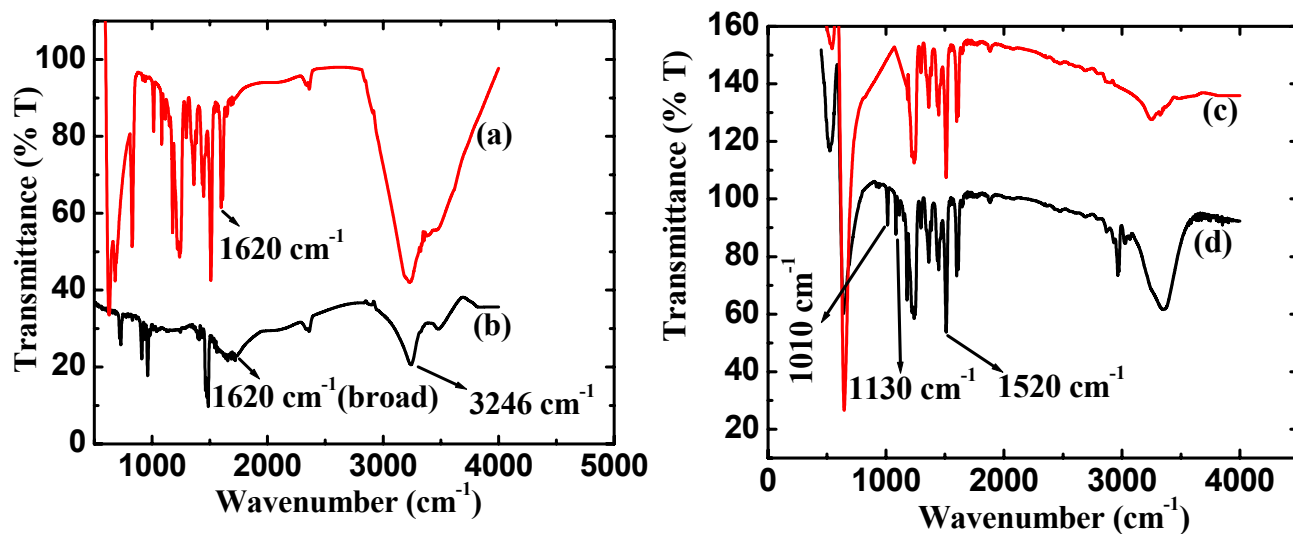

### Figure ESI3

The plot obtained from dynamic light scattering measurement for the TNBS-tailored nanoparticle in presence of variable concentration of melamine.

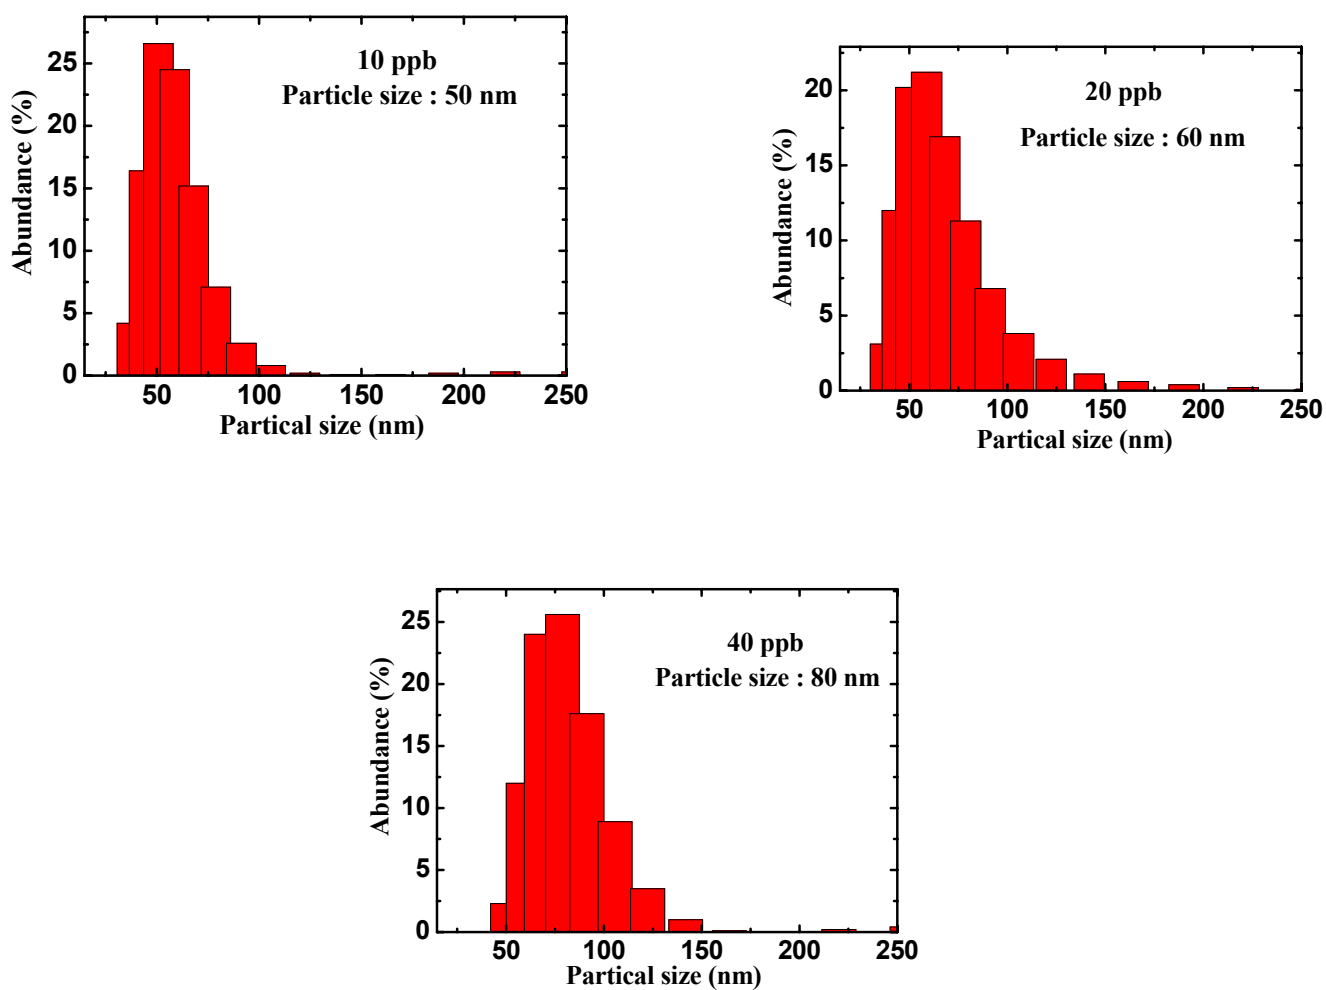

**Figure ESI4**

TEM image of UCA-tailored reporters in the presence of melamine (1 ppm) and inset shows the magnified TEM image.

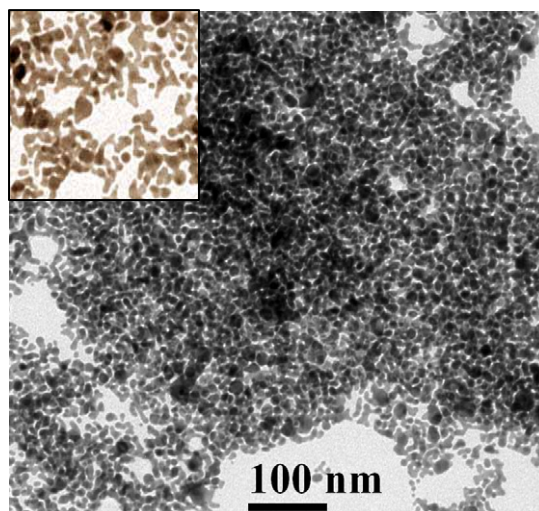

### Figure ESI5

Absorption spectra illustrating the selectivity of the optical sensing method towards melamine using (a) UCA and (b) TBBS-tailored nanoparticles. In the case of UCA-tailored reporter, the selectivity assay was performed with 1 ppm of each analyte whereas the selectivity assay with TNBS-tailored nanoparticle was performed with 50 ppb of the analytes.

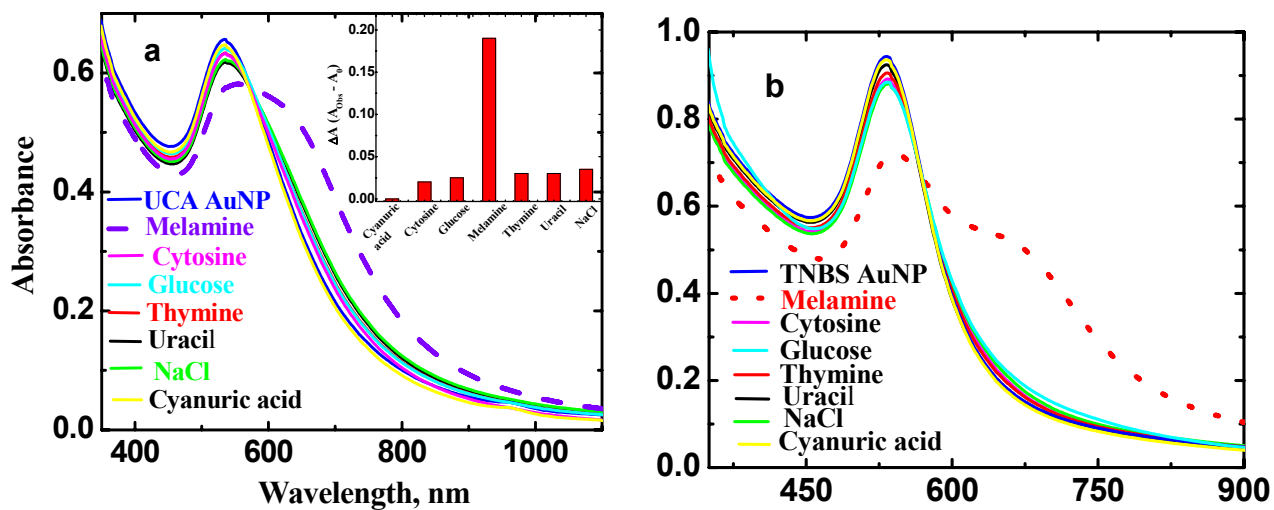

Supplement: c0an00870b.pdf [file c0an00870b.pdf]
